# Supplementary material
Source: publisher figshare collection journal article supplement (https://tandf.figshare.com/articles/dataset/_/25225781)
Supplement: Supplementary file 1 [file 1]

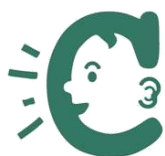

## 【Checklist for Hearing Aid】

Name: \_\_\_\_\_ Date of Birthday: \_\_\_\_\_ Student ID : \_\_\_\_\_ Date

Completed : \_\_\_\_\_

1. Left : ☐ No ☐ Hearing Aid ☐ Cochlear Implant

Make ( e.g. Phonak, AB ) : \_\_\_\_\_ Model ( e.g. Safari 300SP, Cochlear N6 ) : \_\_\_\_\_

Right : ☐ No ☐ Hearing Aid ☐ Cochlear Implant

Make ( e.g. Phonak, AB ) : \_\_\_\_\_ Model ( e.g. Safari 300SP, Cochlear N6 ) : \_\_\_\_\_

2. Hearing Aid Type: ☐ None ☐ Bone conduction ☐ Air conduction ☐ Cross ☐ Other : \_\_\_\_\_

3. During the first year after your child was fit with hearing aids, how many hours a day did she/he wear? \_\_\_\_\_ Hours ;

☐ Child was fit less than 1 year ago

4. How many hours a day does your child currently wear the aid(s)?

Weekday ( Monday to Friday ) : \_\_\_\_\_ Hours

Weekend ( Saturday to Sunday ) : \_\_\_\_\_ Hours

5. How long does your child sleep per day, including naps? \_\_\_\_\_ Hours

6. When your child wakes from sleep (morning or nap), how much time does she/he require before the hearing aid goes on? \_\_\_\_\_ Hours/Minutes

7. Put a ✓ in the boxes below to indicate how consistently your child uses hearing aids

in the situations listed:

| Situation                                                    | Never | Rare | Often | Always | N/A |
|--------------------------------------------------------------|-------|------|-------|--------|-----|
| Home                                                         |       |      |       |        |     |
| Car                                                          |       |      |       |        |     |
| Public Transport<br>( e.g. Train, Metro<br>Railway Transit ) |       |      |       |        |     |
| PreSchool/School                                             |       |      |       |        |     |
| Day Care                                                     |       |      |       |        |     |
| Meal Time                                                    |       |      |       |        |     |
| Playing Alone                                                |       |      |       |        |     |
| Book Sharing                                                 |       |      |       |        |     |
| Playground                                                   |       |      |       |        |     |
| Public<br>( e.g. store, zoo,<br>restaurant )                 |       |      |       |        |     |

8. Are there any particularly challenging times or situations for you or the child for keeping the hearing aid(s) on?

---

References :

Walker, E. A., Spratford, M., Moeller, M. P., Oleson, J., Ou, H., Roush, P., & Jacobs, S. (2013). Predictors of hearing aid use time in children with mild-to-severe hearing loss. *Language, Speech, and Hearing Services in Schools*, 44(1), 73-88.
